# Supplementary material
Source: PubMed Central journal article supplement (PMC7533676)
Supplement: pnas.2009078117.sapp.pdf [file pnas.2009078117.sapp.pdf]

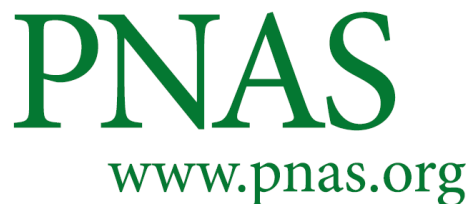

Supplementary Information for

**Kindlin-3 loss curbs chronic myeloid leukemia in mice by mobilizing leukemic stem cells from protective bone marrow niches**

Peter William Krenn<sup>1\*</sup>, Steffen Koschmieder<sup>2</sup>, Reinhard Fässler<sup>1</sup>

<sup>1</sup>Department of Molecular Medicine, Max Planck Institute of Biochemistry, 82152 Martinsried, Germany

<sup>2</sup>Department of Hematology, Oncology, Hemostaseology and Stem Cell Transplantation, Faculty of Medicine, RWTH Aachen University, 52074 Aachen, Germany

\*Corresponding author: [krenn@biochem.mpg.de](mailto:krenn@biochem.mpg.de)

**This PDF file includes:**

Method details

Supplemental figures S1 to S4

Supplemental tables S1 and S2

References SI Appendix

## Method details

### Mice

#### *BM chimera generation*

For the generation of BM mix chimeras, a total of  $10 \times 10^6$  BM cells from BA<sup>cond</sup> K3<sup>cond</sup> intercrosses were mixed with BM cells from F1 (C57BL/6xcongenic B6.SJL) WT mice in a ratio of 1:1 and transplanted into male or female congenic 8-12 week old B6.SJL recipients lethally irradiated with 1x7.5 and 1x6 Gy using a Cs-137 gamma irradiator (Biobeam 2000 from Gamma Service). All chimeras were maintained on antibiotics (Borgal, 1:2000, Virbac) and tetracycline containing water (0.5 g/L) prior to and 8-10 weeks after transplantation. Tetracycline was withdrawn to induce leukemia. To delete K3 in the chimeras, a dose of 5 mg Tamoxifen (Sigma-Aldrich) per mouse was administered orally with a feeding needle on two consecutive days 8 weeks after transplantation or after leukemia development.

#### *32D cell engraftment*

For 32D tumor engraftment studies,  $0.5 \times 10^6$  RFP<sup>+</sup>BA<sup>+</sup>K3<sup>WT</sup> or RFP<sup>+</sup>BA<sup>+</sup>K3<sup>-</sup> 32D cells were intravenously injected into syngeneic C3H/HeOuj mice (Charles River). PB and spleens and BM were harvested 6 or 11 days after engraftment. Red blood cells were removed from PB by incubation with ACK lysis buffer for 5 minutes. Spleen and BM single cell suspensions were obtained by mechanical disruption and subsequent filtration of spleen cells through a 70  $\mu$ m mesh.

For histology, spleens were fixed in 4% PFA, cut into 7  $\mu$ m sections, deparaffinized, rehydrated and washed before staining with Hematoxylin and Eosin (Merck). Images were taken on an EVOS FL AUTO 2 system (Thermo Fisher).

### *Homing*

For LSK CD150<sup>+</sup>CD48<sup>-</sup> cell homing,  $\geq 10 \times 10^6$  CD45.2<sup>+</sup> BM cells from BA<sup>+</sup>K3<sup>WT</sup> or BA<sup>+</sup>K3<sup>-</sup> mice were intravenously injected into CD45.1<sup>+</sup> recipient mice. BM and spleen were harvested 3 hours post injection and single cell suspensions were obtained by mechanically disrupting the organs and filtrating cells through a 70  $\mu$ m mesh. CD45.2<sup>+</sup> LSK CD150<sup>+</sup>CD48<sup>-</sup> cells were counted by flow cytometry. For 32D cell short term homing,  $1.5 \times 10^6$  BA<sup>+</sup>K3<sup>WT</sup> or BA<sup>+</sup>K3<sup>-</sup> cells were stained with the cell trackers Carboxyfluorescein succinimidyl ester (CFSE) or CellTrace Violet (Thermo Fisher), mixed and injected into the left heart ventricle of anaesthetized C3H/HeO/J recipient mice. For quantification of stained cells, organs and PB of recipients were harvested 3 hours post injection. Red blood cells were removed from PB as described above, and spleen and BM derived single cell suspensions were obtained by mechanically disrupting the organs and filtrating cells through a 70  $\mu$ m mesh. CFSE<sup>+</sup> and CellTrace Violet<sup>+</sup> cells were counted by flow cytometry. Cellular dye dilutions were used as a read-outs for completed cell divisions. For determining relative organ homing rates, BA<sup>+</sup>K3<sup>-</sup> cells were normalized to numbers of co-injected BA<sup>+</sup>K3<sup>WT</sup> cells.

### *BrdU uptake*

For 5-bromo-2-deoxyuridine (BrdU, BD Biosciences) uptake studies, BM chimeras or 32D cell-engrafted mice were intraperitoneally injected with 1 mg of BrdU 1.5 hours before BM cell isolations. BrdU<sup>+</sup> LSKs were quantified by combining lineage marker, Sca-1 and c-kit surface staining with intracellular staining for BrdU using APC-BrdU Flow Kit (BD Biosciences). BrdU<sup>+</sup> 32D cells were quantified by combining RFP signals with intracellular staining for BrdU.

### *CTLA-4 aptamer-siRNA treatment*

For *in vivo* knockdown analysis of K3 after CTLA-4-aptamer-siRNA treatment, leukemic mice were injected daily with 1 nmol of CTLA-4 aptamer-tagged scrambled control- or mK3-siRNA on 4 consecutive days into the tail vein before isolating CTLA-4<sup>+</sup> LSK cells by flow cytometry and quantifying K3 RNA.

For treating BA<sup>+</sup>K3<sup>+</sup> mice with the CTLA-4 aptamer-tagged siRNA, 1 nmol of CTLA-4 aptamer-tagged to scrambled control- or mK3-siRNA was intravenously injected into BA<sup>+</sup>K3<sup>+</sup> with PB neutrophil counts >15% 2-times on 5 consecutive days interrupted by 2 treatment-free days to allow tail veins to recover.

For CTLA-4 antibody blocking experiments, leukemic mice were intraperitoneally injected with 100 µg CTLA-4 blocking antibody (clone 9H10, BioLegend) every other day for two weeks.

### *Transplantation assays*

For transplantation of CTLA-4<sup>+</sup> and CTLA-4<sup>-</sup> LSK CD150<sup>+</sup>CD48<sup>-</sup> cells, whole BM cells were isolated from 9 BA<sup>+</sup>K3<sup>WT</sup> mice, pooled, depleted of erythrocytes and sorted for CD45.2<sup>+</sup> LSK CD150<sup>+</sup>CD48<sup>-</sup> CTLA-4<sup>+</sup> and CTLA-4<sup>-</sup> cells, respectively, by flow cytometry. Immediately after sorting, 100 CD45.2<sup>+</sup> LSK CD150<sup>+</sup>CD48<sup>-</sup> CTLA-4<sup>+</sup> and CTLA-4<sup>-</sup> cells, respectively, were transplanted into 1 x 6 Gy irradiated CD45.1<sup>+</sup> recipient mice. Recipients were monitored for PB donor cell repopulation and leukemia development by flow cytometry.

For LSC transplantation after CTLA-4 aptamer treatment, BM cells were isolated from BA<sup>+</sup>K3<sup>WT</sup> mice treated with CTLA-4 aptamer-tagged scrambled control- or mK3-siRNA 1 week after treatment, depleted of erythrocytes and sorted for CD45.2<sup>+</sup> LSK CD150<sup>+</sup>CD48<sup>-</sup> cells by flow cytometry. 100 or 400 CD42.2<sup>+</sup> LSK CD150<sup>+</sup>CD48<sup>-</sup> cells were transplanted into 1 x 6 Gy irradiated CD45.1<sup>+</sup> recipients. Mice were monitored for PB donor cell repopulation and

leukemia development by flow cytometry. LSC frequency was calculated using L-Calc software (StemCell Technologies).

#### Cell line, gene manipulations and treatments

The generation of BA and RFP expressing 32D cells was described previously (1). The deletion of the *FERMT3* gene in BA and RFP expressing 32D was achieved by nucleofecting (Amaxa nucleofector apparatus, Kit V, program E-032) the pSpCas9(BB)-2A-Puro (PX459) V2.0 plasmid containing the murine K3 targeting sgRNA (GTGGCACCCACTTTATTACAGG) and selecting for Puromycin resistance (2).

BA<sup>+</sup>K3<sup>-</sup> 32D cells were rescued by nucleofecting a human K3 cDNA inserted into a modified pCMV3-N-FLAG plasmid (Sino Biological, HG15015-NF) and selecting for plasmid uptake with blasticidin. Murine CTLA-4 expression was achieved by nucleofecting BA<sup>+</sup> 32D cells with a modified pCMV-murine CTLA-4 plasmid (Sino Biological, MG50503-UT) and selecting for plasmid uptake with blasticidin. To analyze cell cycle rates the cell cycle Fucci reporter plasmid pBOB-EF1-FastFucci-Puro (3) was nucleofected into BA<sup>+</sup>K3<sup>+</sup> and BA<sup>+</sup>K3<sup>-</sup> 32D cells and selected for GFP expression using flow cytometry. Inhibition of Bcr-Abl kinase activity was achieved by treating cells with 10  $\mu$ M imatinib (Selleckchem) as described previously (4, 5).

#### Adhesion and chemotaxis assays

Plates with 24-wells or chamber slides ( $\mu$ -slides I<sup>0.8</sup>, ibidi) were pre-coated with either 5  $\mu$ g/ml FN (Merck), protein A (2  $\mu$ g/ml, Sigma-Aldrich) and VCAM-1/Fc (2  $\mu$ g/ml, Sino Biological) or protein A and ICAM-1/Fc (4  $\mu$ g/ml, Sino Biological) over night at 4°C, washed and blocked with 3% bovine serum albumin (BSA).

For static adhesion assays, cells were seeded on FN-, VCAM-1- or ICAM-1-coated 24-well plates for 1 hour prior to removing and replacing the supernatant 3 times and harvesting the

cells by trypsinization. Adherent cells were quantified by reference bead-based quantitative flow cytometry. For adhesion assays under flow, cells were allowed to attach to FN-, VCAM-1- or ICAM-1-coated chamber slides at sub-physiological shear stress ( $0.5 \text{ dyn/cm}^2$ ) prior to increasing shear stress to  $2.5 \text{ dyn/cm}^2$ . Stably adherent cells were analyzed by single cell tracking over time. Integrin blocking was achieved by pre-incubating cells with an anti- $\alpha 4$  integrin antibody (clone PS/2,  $10 \text{ }\mu\text{g/ml}$ , Merck) and RGD peptide (GRGDNP,  $0.5 \text{ mg/ml}$ , Cayman chemical). All adhesion assays were performed in the presence of 0.2% FCS.

For chemotaxis assays, CXCL12 ( $100 \text{ ng/ml}$ , R&D Systems) was added to the lower chamber of a transwell dish ( $5 \text{ }\mu\text{m}$  pore size, Corning Costar). 32D cells left untreated or treated for 24 hours with imatinib ( $10 \text{ }\mu\text{M}$ ) were placed in the upper chamber and 2 hours later cells in the lower chamber were quantified by flow cytometry.

#### Flow cytometry analysis and cell sorting

For flow cytometric experiments, single cell suspensions were prepared from BM (2x femur, 2x tibia, 2x pelvis, and 2x humerus), PB or spleen, immunostained according to standard procedures, and analyzed with a flow cytometer (Fortessa X-20, BD Biosciences) or fluorescence activated cells sorter (FACS ARIA III, BD Biosciences). For immune cell population analysis, cells were stained with primary labeled antibodies for CD45.2, CD45.1, Gr1, Mac-1, CD3e and B220. For T cell activation analysis, cells were stained with primary labeled antibodies for CD3, CD44 and CD62L. For HSPC analysis, cells were stained with primary labeled antibodies for lineage markers (Gr1, Mac-1, CD3, B220, Ter119), sca-1, c-kit and, if required, CD48, CD150 and CTLA-4. For cell viability/apoptosis measurements, cells were stained for Annexin-V. Integrin expression on 32D cells was determined using biotin-labeled primary antibodies specific for  $\beta 1$ ,  $\beta 2$ ,  $\beta 3$ ,  $\beta 7$ ,  $\alpha 5$ ,  $\alpha 4$ ,  $\alpha L$ ,  $\alpha M$  or  $\alpha V$  and streptavidin-

coupled secondary antibodies. For FACS of CTLA-4<sup>+</sup> LSK cells, BM single cell suspensions were incubated with primary labeled antibodies for lineage markers, c-kit, sca-1 and CTLA-4. Subsequently cells were fixed and permeabilized (Cytotfix/Cytoperm Kit, BD Biosciences), and intracellularly stained for CTLA-4. For CTLA-4 aptamer staining, BA<sup>-</sup>K3<sup>WT</sup> or BA<sup>+</sup>K3<sup>WT</sup> mouse mononuclear BM cells were cultured in the presence of 500 nM CTLA-4 aptamer linked to either FITC or Atto488 for 2 hours, washed and analyzed by flow cytometry. For a detailed antibody list see the Table S2.

### Immunofluorescence

For 9EG7 staining, 32D cells were allowed to adhere for 1 hour to FN- or VCAM-1-coated chambers ( $\mu$ -slides VI<sup>0.4</sup>, ibidi). Cells were fixed in 4% PFA, blocked in 3% BSA, stained with 9EG7 antibody and an AlexaFluor-488 labeled anti-rat secondary antibody. Images were obtained on a Zeiss AX10 Apotome system. Single cell fluorescence intensity was analyzed using the Fiji software (6).

For CTLA-4 staining of BM-derived BA<sup>-</sup>K3<sup>WT</sup> or BA<sup>+</sup>K3<sup>WT</sup> LSK CD150<sup>+</sup> cells with the FITC-labeled CTLA-4 aptamer, sorted LSK CD150<sup>+</sup> cells were seeded for 2 hours on to Poly-L-Lysin coated chambers, then fixed in 4% PFA and 0.1% Glutaraldehyde, blocked in 3% BSA, incubated with 200 nM FITC-labeled CTLA-4 aptamer for 2 hours and imaged with an EVOS FL Auto 2 microscope (Thermo Fisher).

### GM-CFU assay

50  $\mu$ l PB was obtained from BM chimeras two weeks post tetracycline withdrawal, lysed using ACK lysing solution, depleted of CD45.1<sup>+</sup> cells (MagniSort, Thermo Fisher), suspended in Iscove's Modified Dulbecco's Medium (IMDM) (Gibco), diluted in methylcellulose containing

expansion medium (MethoCult™ GF M3534, stem cell technologies) and seeded according to the manufacturer's instructions. Colony formation was analyzed 13 days after seeding.

#### CTLA-4 aptamer and siRNA design, stability and efficacy

The CTLA-4 binding RNA aptamer sequence was previously published (7, 8). The Dicer processed siRNAs were designed using the IDT (Integrated DNA technologies) siRNA tool. A continuous RNA consisting of the siRNAs and the CTLA-4 aptamer were synthesized by Eurogentec. For imaging FITC was conjugated to the 5' end of the siRNA sense strand of the CTLA-4 aptamer-tagged siRNA molecules, or the Atto488 dye was conjugated directly at the 3' end of CTLA-4 aptamers. The siRNA stability was increased by methylating the 2'-ribose (2'O-methyl) at the indicated sequence positions (Figure 5E and Figure S4B). For stability analysis, 200 pmol of unmodified and differently modified siRNAs were incubated in 50% FCS at 37°C for 0, 1, 4, 8, 24 or 48 hours. Full length siRNAs (>19 bases) were isolated using the miRNeasy kit (Qiagen) and analyzed by gel electrophoresis. Uptake and function of CTLA-4 aptamer-tagged siRNAs were tested by incubating CTLA-4<sup>+</sup>BA<sup>+</sup>K3<sup>+</sup> 32D with 500 nM of the FITC labeled complex overnight or 72 hours and subsequently determining K3 mRNA levels.

#### RNA isolation, cDNA synthesis and real time quantitative PCR

RNA from 32D cells was extracted with the RNeasy Mini extraction kit (Qiagen). cDNA was prepared with an iScript cDNA Synthesis kit (BioRad) following the manufacturers' instructions. RNA from FACS sorted CTLA-4<sup>+</sup> LSK cells was isolated with an RNeasy FFPE-Kit (Qiagen), purified using an RNA Clean & Concentrator Kit (Zymo Research), amplified and reversely transcribed into cDNA using the MessageBOOSTER™ cDNA Synthesis Kit (Lucigen). qPCR was performed on the LightCycler480 qPCR System (Roche) using iQ SYBR Green Supermix (BioRad) in combination with primers from Table S1.



### Western Blot

Cells were lysed in a Triton X-100 or trichloroacetic acid lysis buffer supplemented with protease and phosphatase inhibitors and subsequently denatured in Laemmli buffer. The protein lysates were separated by SDS–PAGE, transferred to a polyvinylidene difluoride membrane, blocked with 5% milk and incubated with primary and HRP-labeled secondary antibodies followed by enhanced chemiluminescence detection.

### **Resource and material table**

For details concerning reagents, antibodies, inhibitors or kits see Table S2.

## Supplemental figures

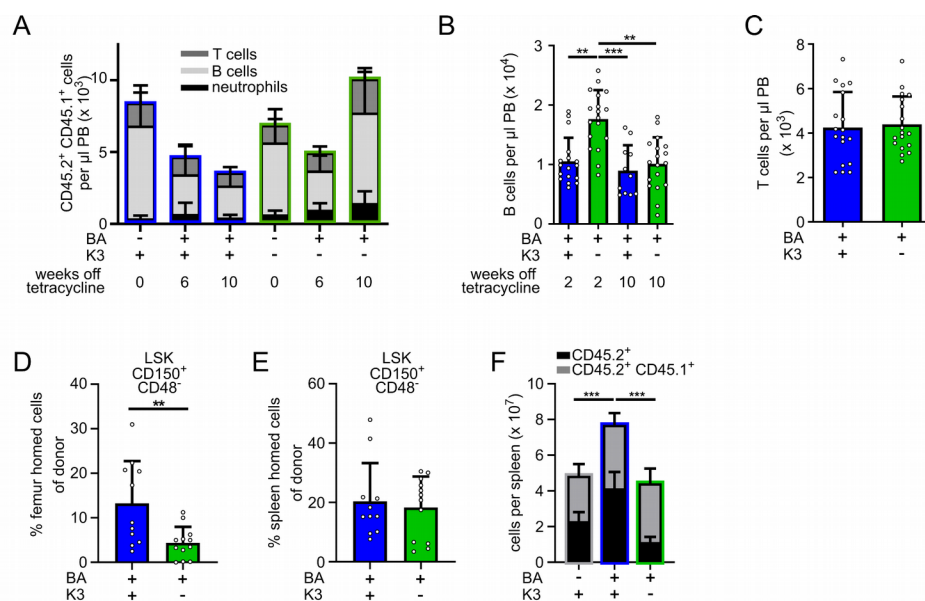

**Figure S1. (A)** CD45.2<sup>+</sup>CD45.1<sup>+</sup> WT T cell, B cell and neutrophil numbers in the PB before tetracycline withdrawal and 6 weeks and 10 weeks after tetracycline withdrawal ( $n \geq 11$ ). **(B)** B cell numbers in the PB 2 weeks or 10 weeks after tetracycline withdrawal ( $n \geq 11$ ). Statistics by one-way ANOVA, Tukey's multiple comparison test. **(C)** T cell numbers in the PB 2 weeks after tetracycline withdrawal ( $n = 18$ ). **(D,E)** Percentage of injected LSK CD150<sup>+</sup>CD48<sup>-</sup> cells homing to the BM (D) and spleen (E) three hours after intravenous injection ( $n = 12$ ). Statistics by unpaired t-test, two-sided. **(F)** Amount of CD45.2<sup>+</sup> transgenic and CD45.2<sup>+</sup>CD45.1<sup>+</sup> WT cells in spleen 6 weeks after tetracycline withdrawal. Statistics by one-way ANOVA, Tukey's multiple comparison test. Data in all figures are shown in mean  $\pm$  SD.

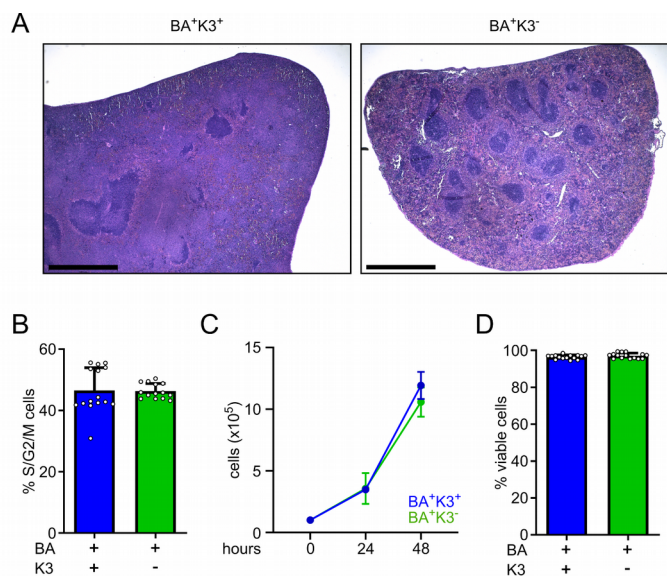

**Figure S2. (A)** H&E stained spleen sections from C3H/HeOuJ mice 11 days post BA<sup>+</sup>K3<sup>+</sup> or BA<sup>+</sup>K3<sup>-</sup> 32D cell transfer. Scale bar indicates 1 mm. **(B)** *In vitro* cell cycle distribution of BA<sup>+</sup>K3<sup>+</sup> or BA<sup>+</sup>K3<sup>-</sup> cells determined with the FUCCI GFP reporter (n≥13). Statistics by unpaired t-test, two-sided. **(C)** *In vitro* growth curve of BA<sup>+</sup>K3<sup>+</sup> or BA<sup>+</sup>K3<sup>-</sup> 32D cells (n≥5). Statistics by multiple t- test, two-sided. **(D)** *In vitro* 32D cell viability (n=15). Statistics by unpaired t-test, two-sided. Data in all figures are shown in mean±SD.

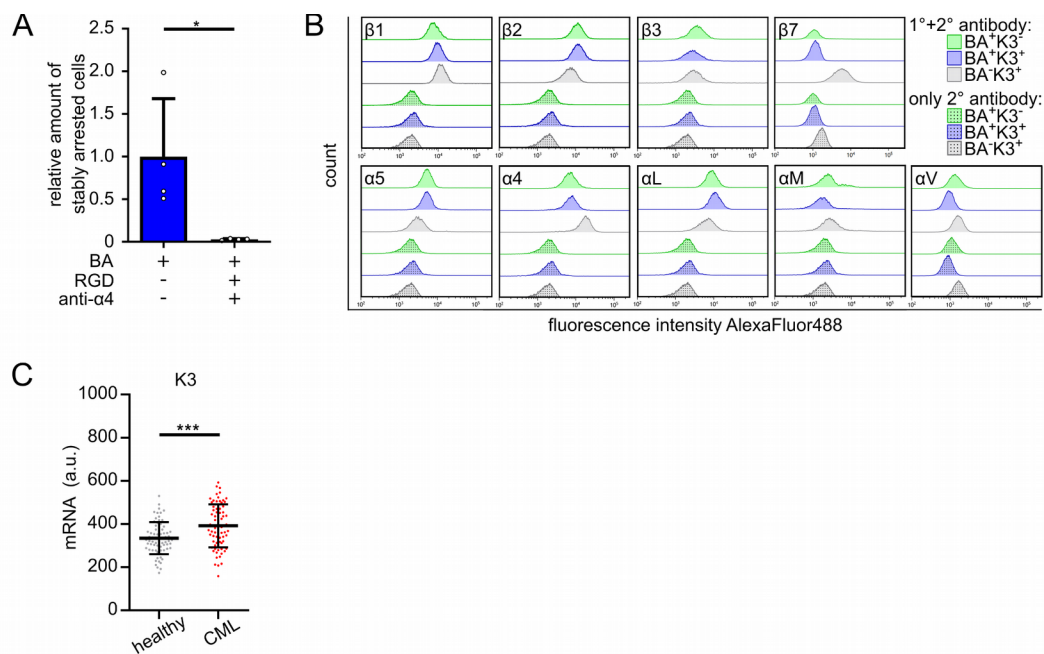

**Figure S3. (A)**  $BA^+K3^+$  32D cell adhesion under flow with or without RGD peptide and anti- $\alpha 4$  integrin antibody pre-treatment (n=4). Statistics by Mann-Whitney test, two-sided. **(B)** Integrin surface profiles of  $BA^-K3^+$ ,  $BA^+K3^+$  and  $BA^+K3^-$  32D cells measured by flow cytometry. **(C)** K3 mRNA levels (a.u. = arbitrary units) in healthy BM controls and CML patient-derived BM samples (MILE study; healthy n=73, CML n=76) extracted from the gene expression dataset of the MILE study. Statistics by unpaired t-test, two-sided. Data in all figures are shown in mean $\pm$ SD.

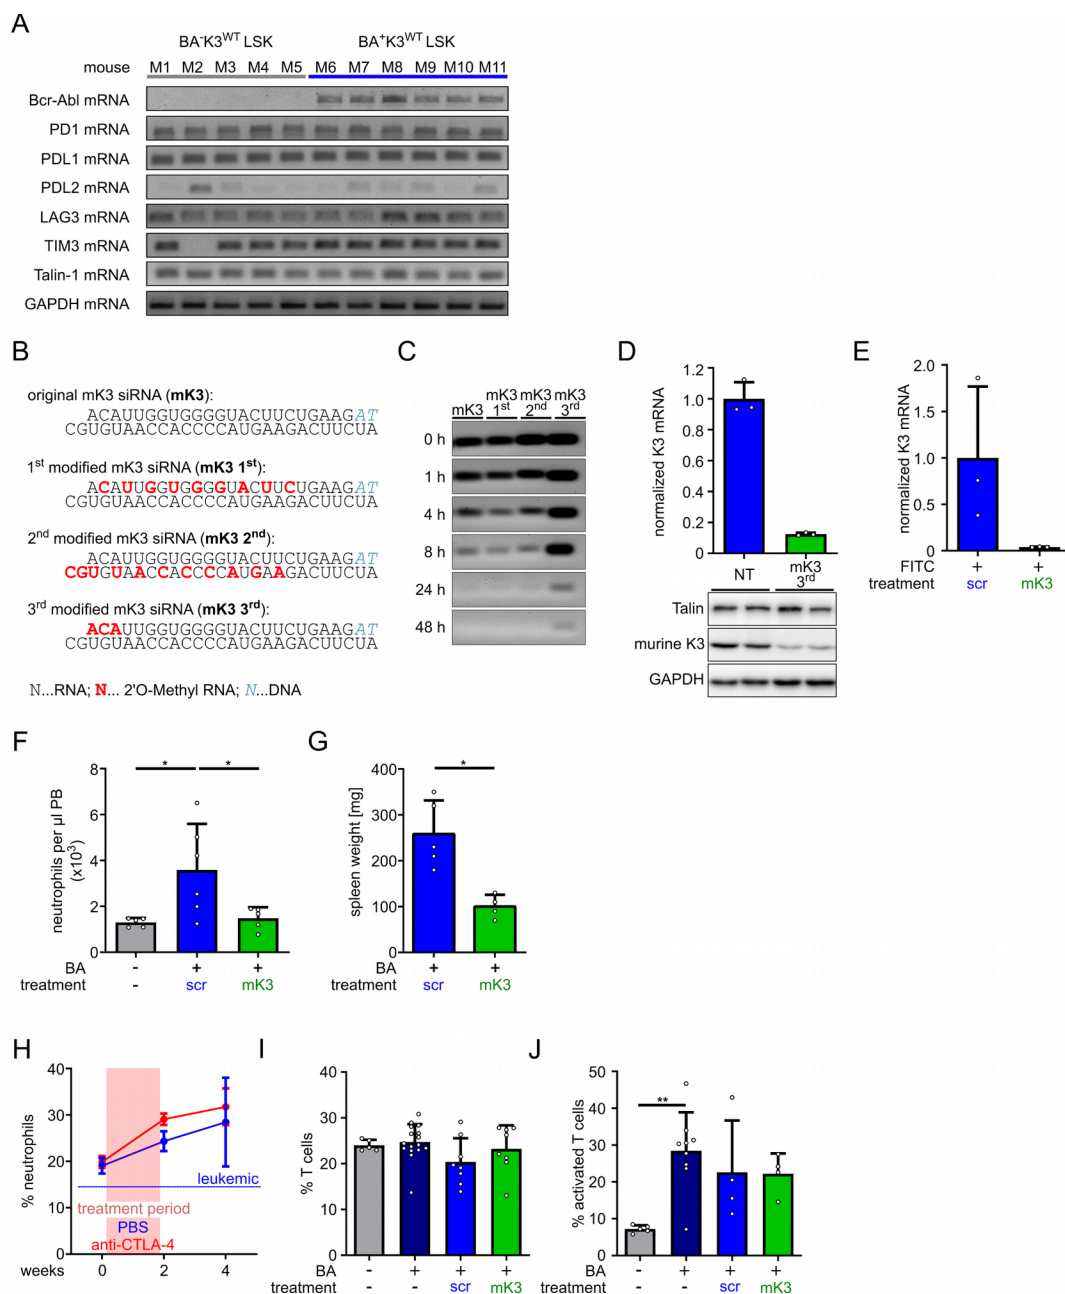

**Figure S4. (A)** Bcr-Abl (same blot as shown in Figure 5A), PD1, PDL1, PDL2, LAG3, TIM3, Talin-1 and GAPDH mRNA in LSK cells isolated from the BM of individual BA<sup>K3</sup><sup>WT</sup> or BA<sup>K3</sup><sup>WT</sup> mice. **(B)** Sequences of murine Kindlin-3 (mK3)-siRNAs unmodified and 2'-O-methylation modified at bases (N) shown in red. **(C)** siRNA stability in 50% FCS at 37°C for 0-48 hours. **(D)** K3 mRNA levels in BA<sup>K3</sup><sup>WT</sup> 32D cells 24 hours after nucleofection with the third modified mK3-siRNA (upper panel, n=3). K3 protein levels in BA<sup>K3</sup><sup>WT</sup> 32D cells 48 hours after nucleofection

with third modified mK3-siRNA (lower panel, n=3). **(E)** K3 mRNA levels in FITC<sup>+</sup>-sorted BA<sup>+</sup>K3<sup>+</sup>CTLA-4<sup>+</sup> 32D cells treated with CTLA-4 aptamer-tagged scrambled control (scr)- or mK3-siRNA labeled with FITC (n=3). Statistics by unpaired t-test, two-sided. **(F)** PB neutrophils in the PB of BA<sup>+</sup>K3<sup>WT</sup> mice before and after treatment with CTLA-4 aptamer-tagged scrambled control- or mK3-siRNA (n≥5). Statistics by one-way ANOVA, Tukey's multiple comparison test. **(G)** Weight of spleens from BA<sup>+</sup>K3<sup>WT</sup> mice after treatment with CTLA-4 aptamer-tagged scrambled control- or mK3-siRNA (n≥4). Statistics by Mann-Whitney test, two-sided. **(H)** PB neutrophils in BA<sup>+</sup>K3<sup>WT</sup> mice after treatment with either PBS or a CTLA-4-blocking antibody (n≥3). Statistics by unpaired t-test, two-sided. Data shown as mean±SEM. **(I,J)** Percentage of T cells **(I)**; n≥5) and activated T cells **(J)**; CD44<sup>+</sup>/CD62L<sup>-</sup>; n≥4) in BA<sup>+</sup>K3<sup>WT</sup> and BA<sup>+</sup>K3<sup>WT</sup> mice before and after treatment with CTLA-4 aptamer-tagged scrambled control- or mK3-siRNA. Statistics by one-way ANOVA, Tukey's multiple comparison test. Data in all figures are shown in mean±SD if not indicated otherwise.

## Supplemental tables

Table S1. Primers

| <b>qPCR primers</b>                       | <b>forward</b>                | <b>reverse</b>                |
|-------------------------------------------|-------------------------------|-------------------------------|
| Bcr-Abl                                   | 5'-GAAGTGTTTCAGAAGCTTCTCC-3'  | 5'-GTTTGGGCTTCACACCATTCC-3'   |
| CTLA-4 murine                             | 5'-GCTTCCTAGATTACCCCTTCTGC-3' | 5'-CGGGCATGGTTCTGGATCA-3'     |
| GAPDH murine                              | 5'-TCCTGCACCACCAACTGCTTAGC-3' | 5'-TGGATGCAGGGATGATGTTCTGG-3' |
| K3 murine                                 | 5'-CACAGCACCGACCTGTCATC-3'    | 5'-CCGCCAGCTAAGACAACCTTT-3'   |
| LAG3 murine                               | 5'-TGTACGAGGGCCAGAGGCTT-3'    | 5'-CCCGGCCACCAAAGGAACA-3'     |
| PD1 murine                                | 5'-ACCCACACATCCAGGGGGCA-3'    | 5'-ACACCCCAGTGTTGGTTTGCGT-3'  |
| PDL1 murine                               | 5'-TGTGGCAGGAGAGGAGACC-3'     | 5'-GTAGTCCGCACCACCGTAGC-3'    |
| PDL2 murine                               | 5'-GCCCCTGGGAAAGGCTTTGT-3'    | 5'-GCACCTCCCCTGTACCTGGA-3'    |
| Talin-1 murine                            | 5'-AAGGCTCTCTGTGGCTTCAC-3'    | 5'-CAGTCCTTGCTGTCCAGCTT-3'    |
| TIM3 murine                               | 5'-CACTGGCCAACCTTGCCTCCA-3'   | 5'-GGATGGCTGCTGGCTGTTGA-3'    |
| <b>3' mRNA end proximity qPCR primers</b> | <b>forward</b>                | <b>reverse</b>                |
| GAPDH murine                              | 5'-TGGACCACCACCCCAGCAA-3'     | 5'-GGCTCCCTAGGCCCTCCTG-3'     |
| K3 murine                                 | 5'-TCCTGTCCACCCGAGAGCGG-3'    | 5'-GGTGGGTGTGGCCTTTGGGG-3'    |

**Table S2.** Resources and materials

| REAGENT or RESOURCE           | SOURCE         | IDENTIFIER                      |
|-------------------------------|----------------|---------------------------------|
| <b>Antibodies</b>             |                |                                 |
| Annexin V FITC                | BioLegend      | 640906                          |
| Annexin V APC                 | BioLegend      | 640919                          |
| B220 (mouse) PE-Cyanine5.5    | Thermo Fisher  | 35-0452-82;<br>RRID:AB_469721   |
| Streptavidin-FITC             | Thermo Fisher  | 11-4317-87                      |
| c-abl/Bcr-Abl                 | CellSignaling  | 2862; RRID:AB_2257757           |
| CD117 (mouse) PE-Cy7          | BD Biosciences | 558163; RRID:AB_647250          |
| CD11a biotin                  | Thermo Fisher  | 13-0111-82;<br>RRID:AB_466356   |
| CD11b PE                      | BD Biosciences | 553311; RRID:AB_394775          |
| CD11b biotin                  | Thermo Fisher  | 13-0112-85;<br>RRID:AB_466360   |
| CD150 (mouse) PerCP/Cy5.5     | BioLegend      | 115922;<br>RRID:AB_2303663      |
| CD16/CD32 (mouse)             | Thermo Fisher  | 14-0161-85;<br>RRID:AB_467134   |
| CD18 (mouse) biotin           | BD Biosciences | 557439; RRID:AB_396702          |
| CD29 (mouse) biotin           | Thermo Fisher  | 13-0291-82;<br>RRID:AB_1518776  |
| CD29 9EG7                     | BD Biosciences | 550531; RRID:AB_393729          |
| CD34 (mouse) PE               | BioLegend      | 152204;<br>RRID:AB_2629648      |
| CD3e (mouse) APC              | BD Biosciences | 553066; RRID:AB_398529          |
| CD44 (mouse) AF700            | Thermo Fisher  | 56-0441-82;<br>RRID:AB_494011   |
| CD45.1 (mouse) APC-eFluor780  | Thermo Fisher  | 47-0453-82;<br>RRID:AB_1582228  |
| CD45.2 (mouse) eFluor450      | Thermo Fisher  | 48-0454-82;<br>RRID:AB_11042125 |
| CD48 (mouse) APC              | BD Biosciences | 562746;<br>RRID:AB_2737765      |
| CD49d biotin                  | BD Biosciences | 557419; RRID:AB_396692          |
| CD49d blocking                | Merck          | CBL1304;<br>RRID:AB_2129897     |
| CD49e biotin                  | BD Biosciences | 557446; RRID:AB_396709          |
| CD51 biotin                   | BioLegend      | 104104; RRID:AB_313073          |
| CD61 (mouse) biotin           | BD Biosciences | 553345; RRID:AB_394798          |
| CD62L                         | BD Biosciences | 553151; RRID:AB_394666          |
| CTLA-4                        | abcam          | ab134090                        |
| CTLA-4                        | BioLegend      | 106205;<br>RRID:AB_2616629      |
| CTLA-4 (mouse) PE             | BD Biosciences | 553720; RRID:AB_395005          |
| GAPDH                         | Merck          | CB1001;<br>RRID:AB_2107426      |
| Gr1 (Ly-6G/Ly-6C; mouse) FITC | BD Biosciences | 553127; RRID:AB_394643          |



|                                                      |                        |                                  |
|------------------------------------------------------|------------------------|----------------------------------|
| Gr1 (Ly-6G/Ly-6C; mouse) PE                          | Thermo Fisher          | 12-5931-83;<br>RRID:AB_466046    |
| hematopoietic lineage (mouse) eFluor450              | Thermo Fisher          | 88-7772-72;<br>RRID:AB_10426799  |
| IgG mouse HRP                                        | JacksonImmunoResearch  | 715-035-151;<br>RRID:AB_2340771  |
| IgG rabbit HRP                                       | JacksonImmunoResearch  | 711-035-152;<br>RRID:AB_10015282 |
| IgG rat AlexaFluor488                                | Thermo Fisher          | A11006;<br>RRID:AB_2534074       |
| Isotype Mouse IgG2a, κ PE                            | BD Biosciences         | 555574; RRID:AB_395953           |
| K3 (human)                                           | in-house-made          | N.A.                             |
| K3 (mouse)                                           | in-house-made          | N.A.                             |
| p-CrkL                                               | Cell Signaling         | 3181; RRID:AB_331068             |
| RFP                                                  | MBL                    | PM005; RRID:AB_591279            |
| sca-1 (mouse) FITC                                   | BD Biosciences         | 553335; RRID:AB_394791           |
| Tubulin                                              | SigmaAldrich           | T9026; RRID:AB_477593            |
| viability dye eFluor450                              | Thermo Fisher          | 65-0863-14                       |
| viability dye eFluor780                              | Thermo Fisher          | 65-0865-14                       |
| <b>Plasmids</b>                                      |                        |                                  |
| pBOB-EF1-FastFUCCI-Puro                              | Koh et al., 2017       | RRID:Addgene_86849               |
| pCMV3-N-FLAG human K3 blasticidin resistance         | Sino Biological        | HG15015-NF                       |
| pCMV3-UT murine CTLA-4 blasticidin resistance        | Sino Biological        | MG50503-UT                       |
| pSpCas9(BB)-2A-Puro (PX459) V2.0                     | Ran et al., 2013       | RRID:Addgene_62988               |
| <b>Chemicals, Peptides, and Recombinant Proteins</b> |                        |                                  |
| 5 bromo 2 deoxyuridine (BrdU)                        | BD Biosciences         | 550891                           |
| Carboxyfluorescein succinimidyl ester (CFSE)         | Thermo Fisher          | C34554                           |
| CellTrace Violet                                     | Thermo Fisher          | C34557                           |
| CXCL12                                               | R&D Systems            | 460-SD                           |
| Eosin                                                | Merck                  | 109844                           |
| Fibronectin                                          | Merck                  | 341631                           |
| Hematoxylin                                          | Merck                  | 105174                           |
| ICAM-1/Fc                                            | Sino Biological        | 50440-M08H                       |
| Imatinib                                             | SelleckChem            | S1026                            |
| Protein A                                            | Sigma-Aldrich          | P6031                            |
| RGD peptide (GRGDNP)                                 | Cayman chemical        | 14501                            |
| Tamoxifen                                            | Sigma-Aldrich          | T5648                            |
| Tetracyclinhydrochloride                             | bela-pharm             | 3311.00.00                       |
| VCAM-1/Fc                                            | Sino Biological        | 50163-M03H                       |
| <b>Kits</b>                                          |                        |                                  |
| Cell Line Nucleofector Kit V                         | Lonza                  | VVCA-1003                        |
| Cytofix/Cytoperm Kit                                 | BD Biosciences         | 554714                           |
| Dead Cell Removal (Annexin V) Kit                    | Stem cell technologies | 17899                            |
| iQ SYBR Green Supermix                               | BioRad                 | 1708884                          |
| iScript cDNA synthesis kit                           | BioRad                 | 1708891                          |
| MagniSort CD45.1                                     | Thermo Fisher          | 8802-6848-74                     |
| MessageBOOSTER cDNA Synthesis kit                    | Lucigen                | MB060124                         |

|                                               |                          |                                                                                                                       |
|-----------------------------------------------|--------------------------|-----------------------------------------------------------------------------------------------------------------------|
| MethoCult GF                                  | Stem cell technologies   | M3534                                                                                                                 |
| miRNeasy kit                                  | Qiagen                   | 217004                                                                                                                |
| PCR Mycoplasma Test Kit II                    | Panreac-Applichem        | A8994                                                                                                                 |
| RNA Clean & Concentrator Kit                  | Zymo Research            | R-1013                                                                                                                |
| Rneasy FFPE-Kit                               | Qiagen                   | 73504                                                                                                                 |
| RNeasy kit                                    | Qiagen                   | 74104                                                                                                                 |
| <b>Experimental Models: Cell Lines</b>        |                          |                                                                                                                       |
| 32D cells                                     | DSMZ, Koschmieder        | ACC-411                                                                                                               |
| Wehi-3B                                       | DSMZ, Koschmieder        | ACC-26                                                                                                                |
| <b>Experimental Models: Organisms/Strains</b> |                          |                                                                                                                       |
| Mouse: B6-Tg(Tal1-tTA)19Dgt = Scl-tTA on B6   | Koschmieder et al., 2005 | N.A.                                                                                                                  |
| Mouse: B6-Tg(tetO-BCR/ABL1)2Dgt =Tre-Bcr-Abl  | Koschmieder et al., 2005 | N.A.                                                                                                                  |
| Mouse: B6.129-Gt(ROSA)26Sortm1(cre/ERT2)Tyj   | The Jackson Laboratory   | 008463                                                                                                                |
| Mouse: B6- Fermt3tm2.1Ref =Fermt3 floxed      | Ruppert et al., 2015     | N.A.                                                                                                                  |
| Mouse: B6.SJL                                 | The Jackson Laboratory   | 002014                                                                                                                |
| <b>Oligonucleotides</b>                       |                          |                                                                                                                       |
| For aptamer-siRNA sequences see Figures 5, S4 | this paper               | N.A.                                                                                                                  |
| For primers see Table S1                      | this paper               | N.A.                                                                                                                  |
| <b>Software and Algorithms</b>                |                          |                                                                                                                       |
| Prism 6                                       | GraphPad                 | <a href="https://www.graphpad.com/scientific-software/prism/">https://www.graphpad.com/scientific-software/prism/</a> |
| Fiji-ImageJ                                   | Schindelin et al., 2012  | <a href="https://fiji.sc/">https://fiji.sc/</a>                                                                       |
| <b>Other</b>                                  |                          |                                                                                                                       |
| Borgal                                        | Virbac                   | 90.002.51                                                                                                             |
| IMDM media                                    | Gibco                    | 12440053                                                                                                              |
| RPMI-1640 media                               | Gibco                    | 21875091                                                                                                              |
| Transwell 5µm pore size                       | Corning Costar           | 3421                                                                                                                  |
| µ-slides VI 0.4                               | ibidi                    | 80601                                                                                                                 |
| µ-slides I 0.8                                | ibidi                    | 80171                                                                                                                 |

## References SI Appendix

1. M. Schemionek *et al.*, Mtss1 is a critical epigenetically regulated tumor suppressor in CML. *Leukemia* **30**, 823-832 (2016).
2. F. A. Ran *et al.*, Genome engineering using the CRISPR-Cas9 system. *Nat Protoc* **8**, 2281-2308 (2013).
3. S. B. Koh *et al.*, A quantitative FastFUCCI assay defines cell cycle dynamics at a single-cell level. *J Cell Sci* **130**, 512-520 (2017).
4. B. J. Druker *et al.*, Effects of a selective inhibitor of the Abl tyrosine kinase on the growth of Bcr-Abl positive cells. *Nat Med* **2**, 561-566 (1996).
5. E. Weisberg, J. D. Griffin, Mechanism of resistance to the ABL tyrosine kinase inhibitor STI571 in BCR/ABL-transformed hematopoietic cell lines. *Blood* **95**, 3498-3505 (2000).
6. J. Schindelin *et al.*, Fiji: an open-source platform for biological-image analysis. *Nat Methods* **9**, 676-682 (2012).
7. S. Santulli-Marotto, S. K. Nair, C. Rusconi, B. Sullenger, E. Gilboa, Multivalent RNA aptamers that inhibit CTLA-4 and enhance tumor immunity. *Cancer Res* **63**, 7483-7489 (2003).
8. A. Herrmann *et al.*, CTLA4 aptamer delivers STAT3 siRNA to tumor-associated and malignant T cells. *J Clin Invest* **124**, 2977-2987 (2014).
